# Supplementary material for: Undiagnosed Diabetes and Prediabetes in Patients with Chronic Coronary Syndromes—An Alarming Public Health Issue
Source: MDPI journal article supplement (doi:10.3390/jcm10091981), 2021-05-05

## Supplementary data

In our study group the diagnosis of DM, IFG or IGT have been made according to WHO criteria (Table S1).

**Table S1.** Values for diagnosis of DM and other categories of hyperglycaemia.

|     | Fasting mM (mg/dL)                                                                               | 2h Post Glucose Load mM (mg/dL) |
|-----|--------------------------------------------------------------------------------------------------|---------------------------------|
| DM  | DM was not diagnosed on the basis of fasting glucose due to availability of a single measurement | ≥11.1 (≥200)                    |
| IGT | No previous DM diagnosis                                                                         | ≥7.8 (140) and < 11.1 (200)     |
| IFG | 5.6 (100)–7.0 (126)                                                                              | < 7.8 (140)                     |

A summary of distribution of dysglycaemia in the examined group is included in Table S2.

**Table S2.** Distribution of glucose metabolism disturbances in patients with OGTT performed (*n* = 546).

|                         |         | IGT        | Newly Diagnosed DM |
|-------------------------|---------|------------|--------------------|
| Fasting Glucose (mg/dL) | <100    | 43 (7.9%)  | 5 (0.9%)           |
|                         | 100–126 | 92 (16.8%) | 12 (2.2%)          |
|                         | ≥126    | 26 (4.8%)  | 11 (2.0%)          |

**Table S3.** Univariate Multinomial Logistic Regression: reference category Normal Glucose Tolerance (NGT).

|                                              |                     | Prediabetes (IFG or IGT) |       |                                |             | DM after hospitalization |       |                                |             |
|----------------------------------------------|---------------------|--------------------------|-------|--------------------------------|-------------|--------------------------|-------|--------------------------------|-------------|
|                                              |                     | <i>p</i> -value          | OR    | 95% Confidence Interval for OR |             | <i>p</i> -value          | OR    | 95% Confidence Interval for OR |             |
|                                              |                     |                          |       | Lower Bound                    | Upper Bound |                          |       | Lower Bound                    | Upper Bound |
| Independent variables during hospitalization | sex: F              | 0.269                    | 0.779 | 0.500                          | 1.214       | 0.324                    | 0.692 | 0.334                          | 1.437       |
|                                              | Waist circumference | 0.411                    | 0.979 | 0.931                          | 1.030       | 0.428                    | 0.970 | 0.901                          | 1.045       |
|                                              | LDL-C               | 0.897                    | 0.987 | 0.807                          | 1.207       | 0.845                    | 0.968 | 0.699                          | 1.341       |
|                                              | HDL-C               | 0.012                    | 0.539 | 0.332                          | 0.875       | 0.000                    | 0.134 | 0.043                          | 0.415       |
|                                              | Triglycerides       | 0.915                    | 0.985 | 0.750                          | 1.295       | 0.027                    | 1.419 | 1.041                          | 1.936       |
|                                              | Total cholesterol   | 0.808                    | 0.978 | 0.816                          | 1.171       | 0.758                    | 1.046 | 0.785                          | 1.393       |
|                                              | BMI                 | 0.002                    | 1.099 | 1.036                          | 1.165       | 0.002                    | 1.142 | 1.051                          | 1.242       |

**Table S4.** Multivariate Multinomial Logistic Regression: reference category Normoglycemic (NG).

|  |       | Prediabetes (IFG or IGT) |       |                                |             | DM after hospitalization |       |                                |             |
|--|-------|--------------------------|-------|--------------------------------|-------------|--------------------------|-------|--------------------------------|-------------|
|  |       | <i>p</i> -value          | OR    | 95% Confidence Interval for OR |             | <i>p</i> -value          | OR    | 95% Confidence Interval for OR |             |
|  |       |                          |       | Lower Bound                    | Upper Bound |                          |       | Lower Bound                    | Upper Bound |
|  | HDL-C | 0.156                    | 0.647 | 0.355                          | 1.180       | 0.004                    | 0.145 | 0.038                          | 0.546       |
|  | BMI   | 0.004                    | 1.114 | 1.035                          | 1.198       | 0.065                    | 1.102 | 0.994                          | 1.223       |

**Figure S1.** The distribution of diagnostic categories according to gender.

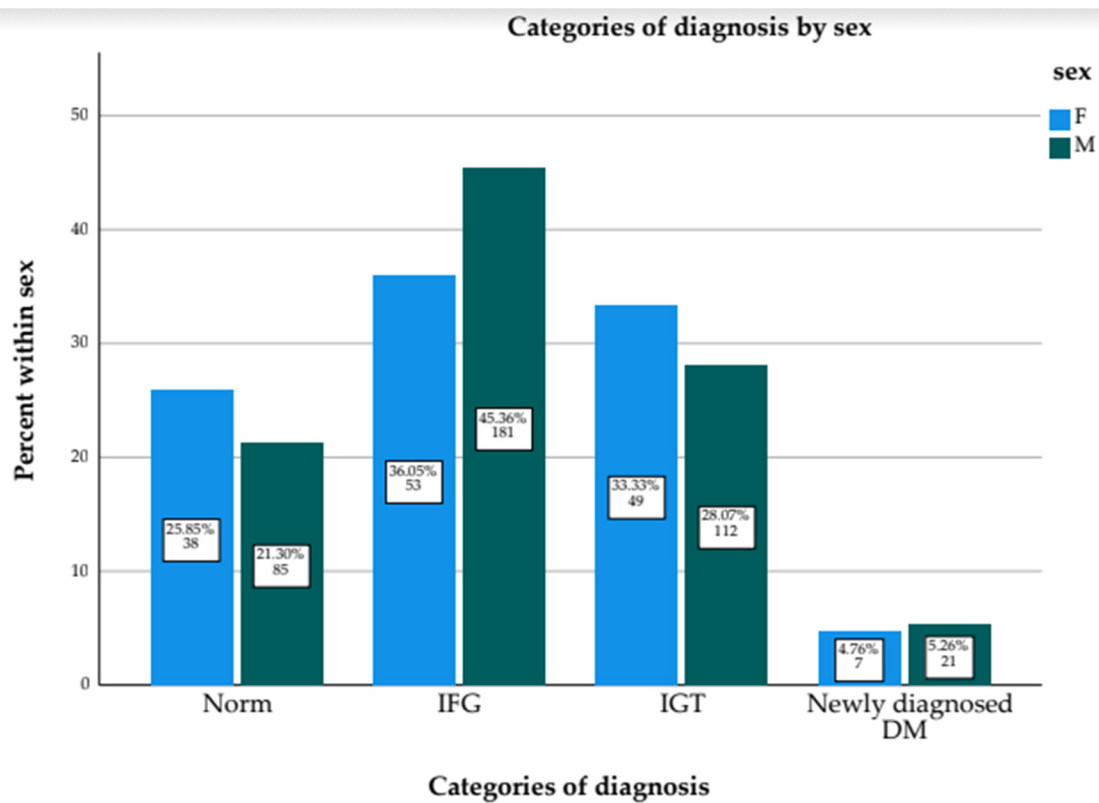

Supplement: s1 [file s1]
